# Supplementary material for: Inhibition of RNA binding to hepatitis C virus RNA-dependent RNA polymerase: a new mechanism for antiviral intervention
Source: PubMed Central journal article supplement (PMC4132742; doi:10.1093/nar/gku632), 2014-07-22
Supplement: supp_gku632_nar-03697-y-2013-File012.pdf [file supp_gku632_nar-03697-y-2013-File012.pdf]

## wwPDB Validation Report

**PDB ID:** 4OOW  
**RCSB ID:** RCSB084765  
**TITLE:** HCV NS5B polymerase with a fragment of quercetagenin  
**AUTHOR(S):** J.F.Guichou, A.Ahmed-Belkacem, B.Rozenn, N.Nazim, E.Hernandez, C.Pallier, J.M.Pawlotsky

### Summary of PDB Entry Validation

The results of the validation of this PDB entry are shown below. No major issues were raised during data processing.

#### Geometry Validation

##### 1. Atomic Clashes

No issues found.

##### 2. Peptide Linkage

No issues found.

##### 3. Covalent Geometry

No issues found.

##### 4. Chirality Error

No issues found.

##### 5. Phi/Psi Torsion Angles

No issues found.

## Individual Residue Outliers on Real Space R-value

No issues found.

## Sequence Validation

The reported biological sequence shows no discrepancy with UniProt sequence (code O92972).

The reported biological sequence and the sequence given in the coordinates show no discrepancy.

## Biological Assembly

The biological assembly predicted by PISA is a monomer. This agrees with author's annotation.

## Ligand Chemistry

Ligand chemistry has been checked against the Chemical Component Dictionary. The following is a summary.

**Identifier:** CAQ  
**Name:** CATECHOL  
**Synonym:** 1,2-DIHYDROXYBENZENE  
**Formula:** C6 H6 O2

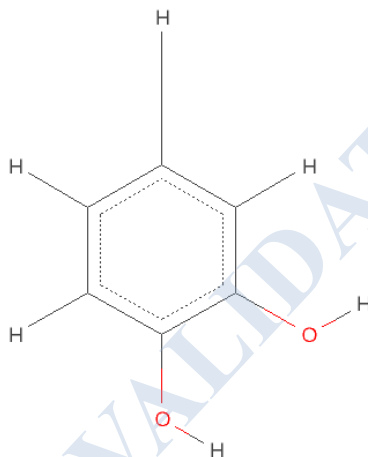

| Type                | Program               | Version | Descriptor                                   |
|---------------------|-----------------------|---------|----------------------------------------------|
| SMILES              | ACDLabs               | 10.04   | Oc1ccccc1O                                   |
| SMILES<br>CANONICAL | CACTVS                | 3.341   | Oc1ccccc1O                                   |
| SMILES              | CACTVS                | 3.341   | Oc1ccccc1O                                   |
| SMILES<br>CANONICAL | OpenEye<br>OEToolkits | 1.5.0   | c1ccc(c(c1)O)O                               |
| SMILES              | OpenEye<br>OEToolkits | 1.5.0   | c1ccc(c(c1)O)O                               |
| InChI               | InChI                 | 1.03    | InChI=1S/C6H6O2/c7-5-3-1-2-4-6(5)8/h1-4,7-8H |
| InChIKey            | InChI                 | 1.03    | YCIMNLLNPGFGHC-UHFFFAOYSA-N                  |

## Summary of Structure Factor Validation

| Structure quality                                 |        |
|---------------------------------------------------|--------|
| Average Occupancy-weighted avg temperature factor | 28.051 |

| Resolution                                        |        |
|---------------------------------------------------|--------|
| High Resolution (Author reported)                 | 2.57   |
| High Resolution (Calculated by REFMAC, V5.7.0029) | 2.570  |
| Low Resolution (Author reported)                  | 48.90  |
| Low Resolution (Calculated by REFMAC, V5.7.0029)  | 84.740 |

| Crystal data                |            |
|-----------------------------|------------|
| Space group                 | P 21 21 21 |
| Total number of reflections | 45600      |
| Number of reflections used  | 43167      |
| Completeness of data        | 94.7       |

| R-factors                                       |        |
|-------------------------------------------------|--------|
| R-factor (Author reported)                      | 0.216  |
| R-factor (Calculated by REFMAC, V5.7.0029)      | 0.2152 |
| Free R-factor (Author reported)                 | 0.277  |
| Free R-factor (Calculated by REFMAC, V5.7.0029) | 0.2743 |

| Wilson statistics (PHENIX, V1.8-1069) |       |
|---------------------------------------|-------|
| Wilson B-factor                       | 32.69 |
| Wilson Scale                          | 0.06  |

| Padilla-Yeates statistics for twin detection (PHENIX, V1.8-1069) |       |
|------------------------------------------------------------------|-------|
| Padilla-Yeates $\langle  L  \rangle$                             | 0.488 |
| Padilla-Yeates $\langle L^*L \rangle$                            | 0.322 |
